# Supplementary material for: Extensively drug-resistant Alcaligenes faecalis infection
Source: Research Square preprint supplement (doi:10.21203/rs.3.rs-27777/v5), 2020-11-02
Supplement: Supplementary file 1 [file 0d7e65c9f9b829641fb43f42.xlsx]

## Sheet: 工作表1
Case No	sex	H-acquired	last admission	LOS	prior3 months	when prior aniti	speci	Resistant	DX	anti	sensitive	RESULT	OPERATI	comorbidities	CO-NUM	Bed-ridden	MIX bacteria	prior3 months
1	M	COMMUNITY	NIL	0 DAYS	nil	NIL	PCN	cip	APN	SAM		cuure	ight ureteral cance	ight ureteral cancer, HTNCKD	3	nil	nil	nil
2	F	community	7 DAYS AGO	0 DAYS	LAST ADMISSION( otherH)	LAST ADMISSION	PCN	all sen	APN	cip	all	cure	renal stone	dm,htn, renal stone	3	nil	Providencia rettgeri	yes, otherH
3	F	COMMUNITY	NIL	0 DAYS	NIL	NIL	PCN	allsen	APN	CIPRO	ALLSEN	CURE		CERCA	1	NIL	P. RETT	NIL
4	F	COMMUNITY	81 DAYS AGO	0 DAYS	era,LVX, cefmatazon	LAST ADMISSION	PCN	allsen	APN	lvx		cure		cer CA,HTN, DM	3	nil	enterocococus	era,LVX, cefmatazon
5	F	COMMUNITY	NIL	0	nil	NIL	PCN	cip	apn	ERTa		cure	renal stone	cad, DM, breast CA,renal stone	4	nil	proteus, E coli	nil
6	F	COMMUNITY	12 DAYA AGO	0	era, tei, cefmata	LAST ADMISSION	PCN	CIP.TZD	apn	ETP		cure		cerCA, hepatitis	2	nil	KP, Pr. Rett	era, tei, cefmata
7	F	COMMUNITY	46 DAYS AGO	0 DAYS	AMC,ETP,CFZ	LAST ADMISSION	PCN	cip,	APN	TEC,ETP		cure		cer CA,HTN, DM	3	nil	proteus	curan, era, cefazoline
7 APN

## Sheet: 工作表2
Case NO	sex	H-acquired	last admission	LOS	prior3 months	when prior aniti	speci	Resistant	DX	anti	sensitive	RESULT	OPERATI	comorbidities	CO-NUM	Bed-ridden	MIX bacteria	prior3 months
1	M	H-acquired	4 days ago	4days	cipro,curam	last admission	Wound	allsen	DMleft leg ulcer and cellulitis	curam	allsen	cure	debre	dm,htn	2	nil	03 Enterococcus spp.	cipro,curam
2	M	COMMUNITY	53 DAYS AGO	0 DAYS	pip,cro,van	LAST ADMISSION	Wound	cip,cefa,gm,Cefuzoxine	DMFright DM foot with toe gangrene	cefa, seftem		cure	debridement	dm,htn,esrd,cvs	4	nil	A20 Proteus vulgaris	pip,cro,van
3	M	COMMUNITY	NIL	0 DAYS	nil	nil	wound	allsen	DMFRight diabetic foot with necrotizing fasciitis	van,cAZ		cure	.Sequestretomy	CKD,DM,CVA	3	nil	citrobacter, mRSA	nil
4	F	COMMUNITY	42 DAYS AGO	0 DAYS	cefazoloin,targocid	LAST ADMISSION	Wound	many	Diabetes mellitus foot with right abscess	cefamen, oxa and opcefazoloin,targocid	CAZ,imi,mep,amk	cure	debridement	DM	1	nil	8 Morganella morgani7 Staphylococcus epidermidis	cefazoloin,targocid
5	F	H-acquired	NIL	7 DAYS	nil	NIL	Wound	allsen	DMFright diabetic foot toe gangrene with necrotizing fasciitis	mep, van	allsen	noheal	amoutation	DN,HTN,ESRD,cad	4	nil	0 Proteus vulgaris,D03 Enterococcus spp.	nil
6	M	COMMUNITY	NIL	0 DAYS	pip.caz,tar,cip	last admission	Wound	R to gm,cip,fep	DMF,PAOD with legs ulcer	CAZ,tar		noheal	debridement	DM,HTN,hepatitis	3	bed	Providencia rettgeri,KP	pip.caz,tar,cip
7	F	COMMUNITY	4 DAYS AGO	0 DAYS	CAZ,Van	last admission	Wound	allR except	DMF, left 5th toe gargrenePAOD	CAZ,van&OP	TGC	cure	operation	DN,HTN,ESRD,	3	nil	KP	CAZ,Van
8	M	H-acquired	1 DAY AGO(other hospital)	7 DAYS	tar,mep,lvx	LAST ADMISSION	Wound	allrest	DMF,PAOD with legs ulcer	coli.CD	TGC	noheal	debridement	DM,HTN,hepatitis	3	be4d	KP.ABEnterococcus faecium	tar,mep,lvx
9	M	COMMUNITY	36 DAYS	0 DAYS	CRO.CAZ,OXA	last admission	wound	TZP	DMF , OSTWEO ,PUS,PAOD	CAZ,VAN,MPM	OTHERS SEN	HEAL	debridement+ sequestrectomy+STSG	DM.HTN.	2	NIL	PSEDO.ENTEROCOCOUS F	CRO.CAZ,OXA
9 DMF

## Sheet: 工作表3
Case No	Sex	H-acquired	LAST ADMISSION	LOS	prior3 months	when prior aniti	speci	Resistant	DX	anti	sensitive	RESULT	OPERATI	comorbidities	CO-NUM	Bed-ridden	MIX bacteria	prior3 months
1	M	COMMUNITY	NIL	5 DAYS	nil	NIL	Bronchial washi	cip	PNEUMONI	cefroxime	all sen excep cipro	cure		HYPOPHRCA,	1	nil	Proteus vulgaris	nil
2	F	COMMUNITY	30 DAYS AGO	5 DAYS	ert,fep,va	LAST ADMISSION	Sputum	allsen	PNEUMONIA	ceftriaxone	all sen	cure		HTN,DM,ESRD,hypothyroid	4	nil	3 Providencia stuartii	ert,fep,va
3	F	COMMUNITY	8 DAYS AGO	2 DAYS	lvx	LAST ADMISSION	Sputum	many	PNEUMONIA	cefepime	S: imip & mep only	exp		DM,HTN,LUNGCA,	3	nil	bruchoderia	lvx
4	M	COMMUNITY	7 DAYS AGO	4 DAYS	caz,lvx,dpm,va	LAST ADMISSION	Sputum	allrerst	PNEUMONIA	tige	S :Tig	cure		HTN,OLDCVA,AMI,	3	BED	nil	caz,lvx,dpm,va
5	M	H-acquired	86 DAYS AGO	7 DAYS	caz,an,imp,tar,cip	LAST ADMISSION	Sputum	allrest	PNEUMONIA	tige	S:tig	cure		DEMEN,COPD,	2	BED	nil	caz,an,imp,tar,cip
6	M	COMMUNITY	5 DAYS AGO	0 DAYS	tzp.mpm.caz,tec,an	LAST ADMISSION	Sputum	many	PNEUMONIA	mepem	S;CAZ, IMI,mep.taz	cure		OLDCVA,HTN,DEMENTIA,CKD	4	BED	Pseudomonas aeruginosa	tzp.mpm.caz,tec,an
7	M	COMMUNITY	70 DAYS AGO	0 DAYS	CRO,UNA	LAST ADMISSION	sputum	CIP.TZP	PNEUMONI	FORTUM	caz,TIE,GENDEAD	DEATH	NIL	SQCA	3	NIL	OSSA	CRO,UNA
8	M	H-acquired	NIL	190 DAYS	ALLANTIBIOTICS	same hospitalization	sputum	??????	PNEUMONIA	CAZ.AMK	??????	CURE	NIL	HCVD,COPD,CKD	3	BED	PSEDO	ALLANTIBIOTICS
8 pneumonia

## Sheet: 工作表4
Case No	sex	H-acquired	LAST ADMISSION	LOS	prior3 months	when prior aniti	speci	Resistant	DX	anti	sensitive	RESULT	OPERATI	comorbidities	CO-NUM	Bed-ridden	MIX bacteria	prior3 months
1	M	COMMUNITY	NIL	0 DAY	nil	NIL	Urine	alllsen	uti	MXF	allsen	cure		CVA, HTTn, DM	3	nil	B03 Nonfermentative gram-negative bacilli	nil
2	M	COMMUNITY	NIL	0 DAY	nil	NIL	Urine	allsen	uti	LVX		cure		nil	0	nil;	nil	nil
3	F	COMMUNITY	NIL	2 DAYS	NIL	NIL	Urine	CIP	UTI	LVX,SAM		CURE		DM,CKD	2	NIL	ENTEROCOCOUS	NIL
4	F	COMMUNITY	NIL	2 DAYS	nil	NIL	Urine	allsen	uti	FEP,LVX	all sen	cure		DM,HTN< dementia	3	nil	nil	nil
5	F	COMMUNITY	11 DAYS AGO	1 DAYS	FEP	LASTADMISSION	Urine	CIP,FEP	UTI	ETP		CURE		HTN,DM,CVA	3	BED	P.RETT	FEP
6	F	COMMUNITY	60 days ( other H)	2 DAYS	unknow	LASTADMISSION	URINE	CIP, FEP	Urosepsis	CTX		death		HTNCKD	2	nil	kp, Pr. Rett	CAZ,CIP.Amp
7	F	COMMUNITY	NIL	0 DAY	nil	NIL	Urine	allsec	urosepsis	fep	allsen	death	death at ER	DM,HTN< dementia	3	bed	proteus	nil
8	M	COMMUNITY	NIL	1DAYS	NIL	NIL	Urine	allsen	UTI	MXF	ALLSEN	CURE		CVA	1	NIL	CIYROBACTER KOSERI	NIL
9	M	COMMUNITY	NIL	1DAYS	nil	NIL	Urine	gm,amk,cip,fep,SAM	UTI	CAZ		cure		copd,htn,cva	3	nil	nil	nil
10	F	COMMUNITY	NIL	0 DAY	nil	NIL	Urine	allsen	uti	CMZ	allsen	cure		htn, dementia	2	bed	E.coli	nil
11	M	COMMUNITY	NIL	1 DAYS	LVX	AT ER (COPD-AE0	Urine	CIP,TZP	UTI	SAM		CURE		HCVD,COPD	2	NIL	CHRYSEOBACTERIA MENIN	LVX
12	M	COMMUNITY	5 DAYS AGO	0 DAY	CRO,CAZ	LASTADMISSION	Urine	allsen	uti	LVX		cure		htn,copd,cva	3	bed	nil	CRO,CAZ
13	M	COMMUNITY	20 DAYS	0 DAY	lvx	LASTADMISSION	Urine	cip,TZP,GM	uti	ETP		cure		copd, dementia	2	bed	E.coli	lvx
14	M	COMMUNITY	NIL	0DAYS	LVX	ATER(COPD,AE0	Urine	cip	uti	CAZ		cure		HTN,DN<CVA,CKD	4	bed	Providencia stuartii	LVX
15	M	COMMUNITY	NIL	0 DAY	nil	NIL	Urine	????	uti	LVX	?????	cure		esrd	1	nil	serratia maces	nil
16	F	COMMUNITY	NIL	0DAY	nil	NIL	Urine	?????	UTI	LVX	:?????	cure		CAD,dementia,CKD	3	nil	nil	nil
17	F	COMMUNITY	NIL	0 DAY	nil	NIL	Urine	cip,tzd	uti	ETP		cure		braintumor	1	nil	Providencia stuartii	nil
18	M	COMMUNITY	6 DAYS	0 DAY	CRO,cefazoline	LASTADMISSION	Urine	CIP,TZD	UTI	SAM		CURE		DM	1	NIL	ENTEROBCTER CLOACAE	CRO,cefazoline
19	M	COMMUNITY	other H ( 30 days)	0 DAY	unknow	LASTADMISSION	Urine	allsen	uti	LVX		cure		hepatitis,CVA,DM	3	nil	Pseudomonas aeruginosa	amo
20	M	COMMUNITY	70 DAYS AGO	2 DAYS	LVX	LASTADMISSION	Urine	CIP,TZD	UTI	CAZ		CURE		DM,HTN,COPD,CVA	4	BED	MOGANELLA	LVX
21	F	COMMUNITY	63 DAYS	0 DAY	CEFAZOLINE,CEFMETA	LASTADMISSION	Urine	CIP,TZD	UTI	CAZ		CURE		SLE,DM,HEPATITS3	3	NIL	SERRATIA MARCESCENS	CEFAZOLINE,CEFMETA
22	M	COMMUNITY	14 DAYS	1 DAYS	lvx,fep	LASTADMISSION	Urine	ALLSEN	UTI	LVX		CURE		DM,HTN,COPD,CVA	4	BED	ENTEROCOCCUS	lvx,fep,coli,
23	M	COMMUNITY	other H ( 48 days)	0 DAY	unknow	LASTADMISSION	Urine	cip.tzd	uti	MEM		cure		cAD,CVA	2	bed	nil	cip
24	M	COMMUNITY	2DAYS AGO	0 DAY	tei, fep	LASTADMISSION	Urine	cip,tzd	uti	CEFPIME		cure		CAD, CVA	2	nil	Providencia stuartii	tei, fep
25	F	COMMUNITY	other H ( 21 days)	1 DAY	unknow	LASTADMISSION	urine	TZP	UTI	CEFPIME	OTHR ANTI	CURE	NIL	DM,HTN,DEMENTIA,FOLEY	3	NIL	PROTEUS	SEFTEM
25 cystitis

## Sheet: 工作表5
case No	sex	H-acquired	last admission	LOS	prior3 months	when prior aniti	speci	Resistant	DX	anti	sensitive	RESULT	OPERATI	comorbidities	CO-NUM	Bed-ridden	MIX bacteria	prior3 months
1	M	COMMUNITY	NIL	0days	nil	NIL	Pleural effusio	many	pleuralempyema,chronic	Moxifloxacin then Augmentin	,imi,mep,amk	cure	nil	nil	0	nil	1 Pseudomonas aeruginosa3 Providencia stuartii	nil
2	F	H-acquired	56days	3days	AMC	last admission	Pleural effusio	ALLSEN	pleural EMPYEMA	CAZ_DRAIN	ALLSEN	CURE		ckd,dm,htn, lC	4	nil	ENTEROBACTER CLOACAE, AB	curam
3	M	COMMUNITY	nil	0days	nil	NIL	Pus	allsen	OTITIS MEDIUM	ofloxacin drop		cure		nil	0	nil	pseo,CNS	nil
4	M	COMMUNITY	nil	0days	NIL	NIL	pus	cip	OTITIS MEDIUM	ORAL BAKTAR	OTHERS SEN		NIL		0	NIL	serratia, ossa	NIL
5	M	H-acquired	no	22days	CAZ,Mep,Cip	same hospitalization	Ascites	cip	peritonitis	brosym& Drain		cure	pseudocyst of pancreas	hepTITIA	1	nil	ENTEROBACTER CLOACAE, EBTEROBACTER FAECALIS	CAZ,Mep,Cip
6	F	H-acquired	NIL	9DAYS	NIL	NIL	pus	CAZ,GM,UNA,FEP,TZP	surgical wound infection	CEFAZOLINE& DRAIN		cure	.Left crainoplasty	brain tumor	1	NIL	Aeromonas hydrophila	NIL
7	F	COMMUNITY	NIL	0days	nil	NIL	Pus	?????	pelvis bascess	seftem& drain	?????	cure		rectal CA, CKD, HTN	3	nil	ecoli, streptococcusD08 Streptococcus group D non enterococcus	nil
8	M	COMMUNITY	nil	odays	cepha	last admission	Pus	?????	scrotum abscess	cepha	??????	cure	Sequestrectomy	nil	0	nil	Pseosu,proteus	cepha
9	M	H-acquired	NIL	3days	NIL	NIL	wound	NIL	leg burn wound infectio	TEICO, CRO	ALLSEN	heal	.debridement,STSG	NIL	0	NIL	PRO,PSEDO.ENTEROCOCOUS F,	NIL
10	M	COMMUNITY	12 days AGO	0	CAZ,VAN,AMK	last admission	Blood	cip	BCTEREMIA	lVX		cure		dm,htn,cva	3	bed	NIL	fep,van,amk
11	M	COMMUNITY	21DAYS AGO	1DAYS	CAZ,VAN	last admission	Blood	cip,fep,	BCTEREMIA	lvx,taz		cure		htn, deme	2	bed	Enterococcus faecalis	CAZ,van,amk
12	F	COMMUNITY	nil	0	nil	NIL	Blood	cip,fep	BCTEREMIA	CRO		cure		cholangiocarcinoma, demen	2	nil	morganella	nil

## Sheet: Sheet1
Case NO	Sex	H-acquired	LAST ADMISSION	LOS	prior3 months	when prior aniti	speci	Resistant	DX	anti	sensitive	RESULT	OPERATI	comorbidities	CO-NUM	Bed-ridden	MIX bacteria	prior3 months
1	M	H-acquired	4 days ago	4days	cipro,curam	last admission	Wound	allsen	DMleft leg ulcer and cellulitis	curam	allsen	cure	debre	dm,htn	2	nil	03 Enterococcus spp.	cipro,curam
2	F	H-acquired	NIL	7 DAYS	nil	NIL	Wound	allsen	DMFright diabetic foot toe gangrene with necrotizing fasciitis	mep, van	allsen	noheal	amoutation	DN,HTN,ESRD,cad	4	nil	0 Proteus vulgaris,D03 Enterococcus spp.	nil
3	M	H-acquired	1 DAY AGO	7 DAYS	tar,mep,lvx	LAST ADMISSION	Wound	allrest	DMF,PAOD with legs ulcer	coli.CD	TGC	noheal	debridement	DM,HTN,hepatitis	3	be4d	KP.ABEnterococcus faecium	tar,mep,lvx
4	M	H-acquired	86 DAYS AGO	7 DAYS	caz,an,imp,tar,cip	LAST ADMISSION	Sputum	allrest	PNEUMONIA	tige	S:tig	cure		DEMEN,COPD,	2	BED	nil	caz,an,imp,tar,cip
5	M	H-acquired	NIL	190 DAYS	ALLANTIBIOTICS	THIS ADMISSION	sputum	??????	PNEUMONIA	CAZ.AMK	??????	CURE	NIL	HCVD,COPD,CKD	3	BED	PSEDO	ALLANTIBIOTICS
6	M	H-acquired	NIL	22days	CAZ,Mep,Cip	same hospitalization	Ascites	cip	peritonitis	brosym& Drain		cure	pseudocyst of pancreas	hepTITIA	1	nil	ENTEROBACTER CLOACAE, EBTEROBACTER FAECALIS	CAZ,Mep,Cip
7	F	H-acquired	NIL	9DAYS	NIL	NIL	pus	CAZ,GM,UNA,FEP,TZP	surgical wound infection	CEFAZOLINE& DRAIN		cure	.Left crainoplasty	brain tumor	1	NIL	Aeromonas hydrophila	NIL
8	F	H-acquired	56days	3days	curam	last admission	Pleural effusio	ALLSEN	pleural EMPYEMA	CAZ_DRAIN	ALLSEN	CURE		ckd,dm,htn, lC	4	nil	ENTEROBACTER CLOACAE, AB	curam
9	M	H-acquired	NIL	3days	NIL	NIL	wound	NIL	leg burn wound infectio	TEICO, CRO	ALLSEN	heal	.debridement,STSG	NIL	0	NIL	PRO,PSEDO.ENTEROCOCOUS F,	NIL

## Sheet: Sheet2
Case NO	sex	DX	comorbidities	CO-NUM	Bed-ridden
1	M	APN	ight ureteral cancer, HTNCKD	3	nil
2	F	APN	dm,htn, renal stone	3	nil
3	F	APN	CERCA	1	NIL
4	F	APN	cer CA,HTN, DM	3	nil
5	F	apn	cad, DM, breast CA,renal stone	4	nil
6	F	apn	cerCA, hepatitis	2	nil
7	F	APN	cer CA,HTN, DM	3	nil
8	M	DMleft leg ulcer and cellulitis	dm,htn	2	nil
9	M	DMFright DM foot with toe gangrene	dm,htn,esrd,cvs	4	nil
10	M	DMFRight diabetic foot with necrotizing fasciitis	CKD,DM,CVA	3	nil
11	F	Diabetes mellitus foot with right abscess	DM	1	nil
12	F	DMFright diabetic foot toe gangrene with necrotizing fasciitis	DN,HTN,ESRD,cad	4	nil
13	M	DMF,PAOD with legs ulcer	DM,HTN,hepatitis	3	bed
14	F	DMF, left 5th toe gargrenePAOD	DN,HTN,ESRD,	3	nil
15	M	DMF,PAOD with legs ulcer	DM,HTN,hepatitis	3	be4d
16	M	DMF , OSTWEO ,PUS,PAOD	DM.HTN.	2	NIL
17	M	PNEUMONI	HYPOPHRCA,	1	nil
18	F	PNEUMONIA	HTN,DM,ESRD,hypothyroid	4	nil
19	F	PNEUMONIA	DM,HTN,LUNGCA,	3	nil
20	M	PNEUMONIA	HTN,OLDCVA,AMI,	3	BED
21	M	PNEUMONIA	DEMEN,COPD,	2	BED
22	M	PNEUMONIA	OLDCVA,HTN,DEMENTIA,CKD	4	BED
23	M	PNEUMONI	SQCA	3	NIL
24	M	PNEUMONIA	HCVD,COPD,CKD	3	BED
25	M	cystitis	CVA, HTTn, DM	3	nil
26	M	cystitis	nil	0	nil;
27	F	cystitis	DM,CKD	2	NIL
28	F	cystitis	DM,HTN< dementia	3	nil
29	F	cystitis	HTN,DM,CVA	3	BED
30	F	Urosepsis	HTNCKD	2	nil
31	F	urosepsis	DM,HTN, dementia	3	bed
32	M	cystitis	CVA	1	NIL
33	M	cystitis	copd,htn,cva	3	nil
34	F	cystitis	htn, dementia	2	bed
35	M	cystitis	HCVD,COPD	2	NIL
36	M	cystitis	htn,copd,cva	3	bed
37	M	cystitis	copd, dementia	2	bed
38	M	cystitis	HTN,DN<CVA,CKD	4	bed
39	M	cystitis	esrd	1	nil
40	F	cystitis	CAD,dementia,CKD	3	nil
41	F	cystitis	braintumor	1	nil
42	M	cystitis	DM	1	NIL
43	M	cystitis	hepatitis,CVA,DM	3	nil
44	M	cystitis	DM,HTN,COPD,CVA	4	BED
45	F	cystitis	SLE,DM,HEPATITS3	3	NIL
46	M	cystitis	DM,HTN,COPD,CVA	4	BED
47	M	cysitis	cAD,CVA	2	bed
48	M	cystitis	CAD, CVA	2	nil
49	F	cystitis	DM,HTN,DEMENTIA,FOLEY	3	NIL
50	M	BCTEREMIA	dm,htn,cva	3	bed
51	M	BCTEREMIA	htn, deme	2	bed
52	F	BCTEREMIA	cholangiocarcinoma, demen	2	nil
53	M	leg burn wound infectio	NIL	0	NIL
54	M	OTITIS MEDIUM	nil	0	nil
55	M	OTITIS MEDIUM	nil	0	NIL
56	F	pelvis bascess	rectal CA, CKD, HTN	3	nil
57	M	peritonitis	hepTITIA	1	nil
58	F	pleural EMPYEMA	ckd,dm,htn, lC	4	nil
59	M	pleuralempyema,chronic	nil	0	nil
60	M	scrotum abscess	nil	0	nil
61	F	surgical wound infection	brain tumor	1	NIL
